# Supplementary material for: Highly efficient metalloporphyrin-based nanosensors for NO detection
Source: Royal Society of Chemistry journal article supplement (doi:10.1039/d2cp01553f), 2022-01-01
Supplement: d2cp01553f1.pdf [file d2cp01553f1.pdf]

**Supporting Information**

**Highly Sensitive, Selective and Low-Power  
Consumption MetalloporphyrinBased Junctions  
for Nitrogen Monoxide Detection with Excellent  
Recovery**

Azar Ostovan\* and S. Shahab Naghavi\*

*Department of Physical and Computational Chemistry, Shahid Beheshti University,  
1983969411 Tehran, Iran*

E-mail: a\_ostovan@sbu.ac.ir; s\_naghavi@sbu.ac.ir

Table S1: Calculated relative adsorption energy ( $E_{ads}$ , eV) of various configurations of NO binding over studied MPors. The considered configurations are shown in Figure S2.

| Device | $E_A$               | $E_B$ | $E_T$              |
|--------|---------------------|-------|--------------------|
| Sc     | $3 \times 10^{-4}$  | 0.00  | 0.053              |
| Ti     | $3 \times 10^{-4}$  | 0.00  | 0.144              |
| V      | 0.21                | 0.00  | 0.014              |
| Cr     | 1.09                | 0.00  | 0.001              |
| Mn     | 0.001               | 0.00  | 0.001              |
| Fe     | $12 \times 10^{-4}$ | 0.00  | $8 \times 10^{-4}$ |
| Co     | 0.001               | 0.00  | 0.003              |
| Ni     | 0.001               | 0.00  | $1 \times 10^{-4}$ |
| Cu     | 0.001               | 0.00  | 0.023              |
| Zn     | 0.007               | 0.00  | 0.012              |

Table S2: Calculated adsorption energy ( $E_{ads}$ , eV), bond length ( $d$ , Å), and difference in Hirshfeld charge (CT) of central ion-magnet after NO adsorption.

| Device | $E_{ads}$ | $d$  | CT    |
|--------|-----------|------|-------|
| Sc     | -2.09     | 1.79 | -0.61 |
| Ti     | -2.04     | 1.83 | -1.02 |
| V      | -1.78     | 1.90 | -0.53 |
| Cr     | -0.56     | 1.79 | -0.32 |
| Mn     | -0.36     | 1.91 | -0.19 |
| Fe     | -1.33     | 1.66 | -0.63 |
| Co     | -1.18     | 1.75 | -0.58 |
| Ni     | -0.09     | 2.03 | -0.03 |
| Cu     | -0.25     | 1.81 | -0.15 |
| Zn     | -0.41     | 1.29 | -0.28 |

Table S3: Calculated recovery time ( $\tau$ , s) of NO gas from *M*Por based devices.

| Device | $\tau$                |
|--------|-----------------------|
| Sc     | $1.5 \times 10^{18}$  |
| Ti     | $8.3 \times 10^{17}$  |
| V      | $7.58 \times 10^{17}$ |
| Cr     | $25 \times 10^{-2}$   |
| Mn     | $1 \times 10^{-7}$    |
| Fe     | $2.17 \times 10^{+5}$ |
| Co     | $6.37 \times 10^{+5}$ |
| Ni     | $32 \times 10^{-12}$  |
| Cu     | $16 \times 10^{-8}$   |
| Zn     | $0.76 \times 10^{-5}$ |

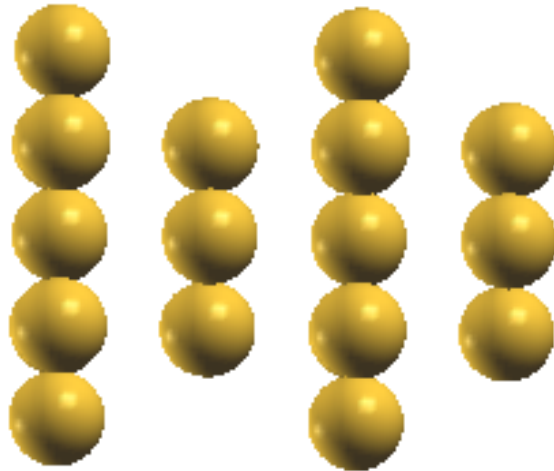

(a)

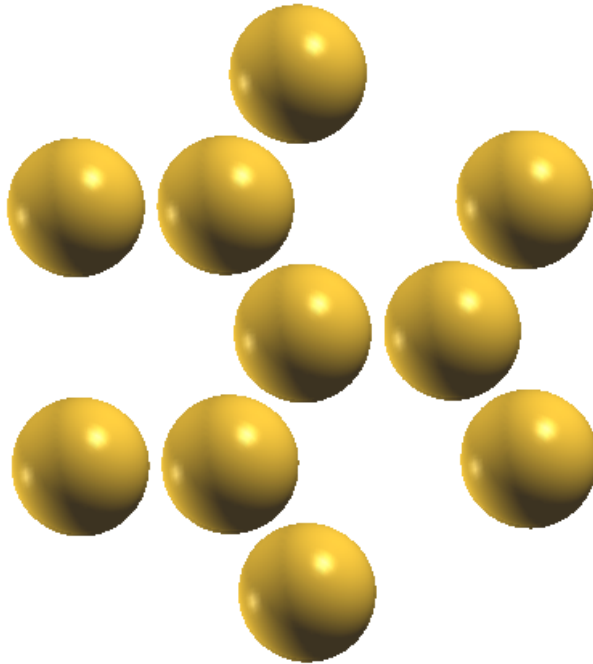

(b)

Figure S1: (a) Side and (b) Top view Au electrodes used for device designing in this study.

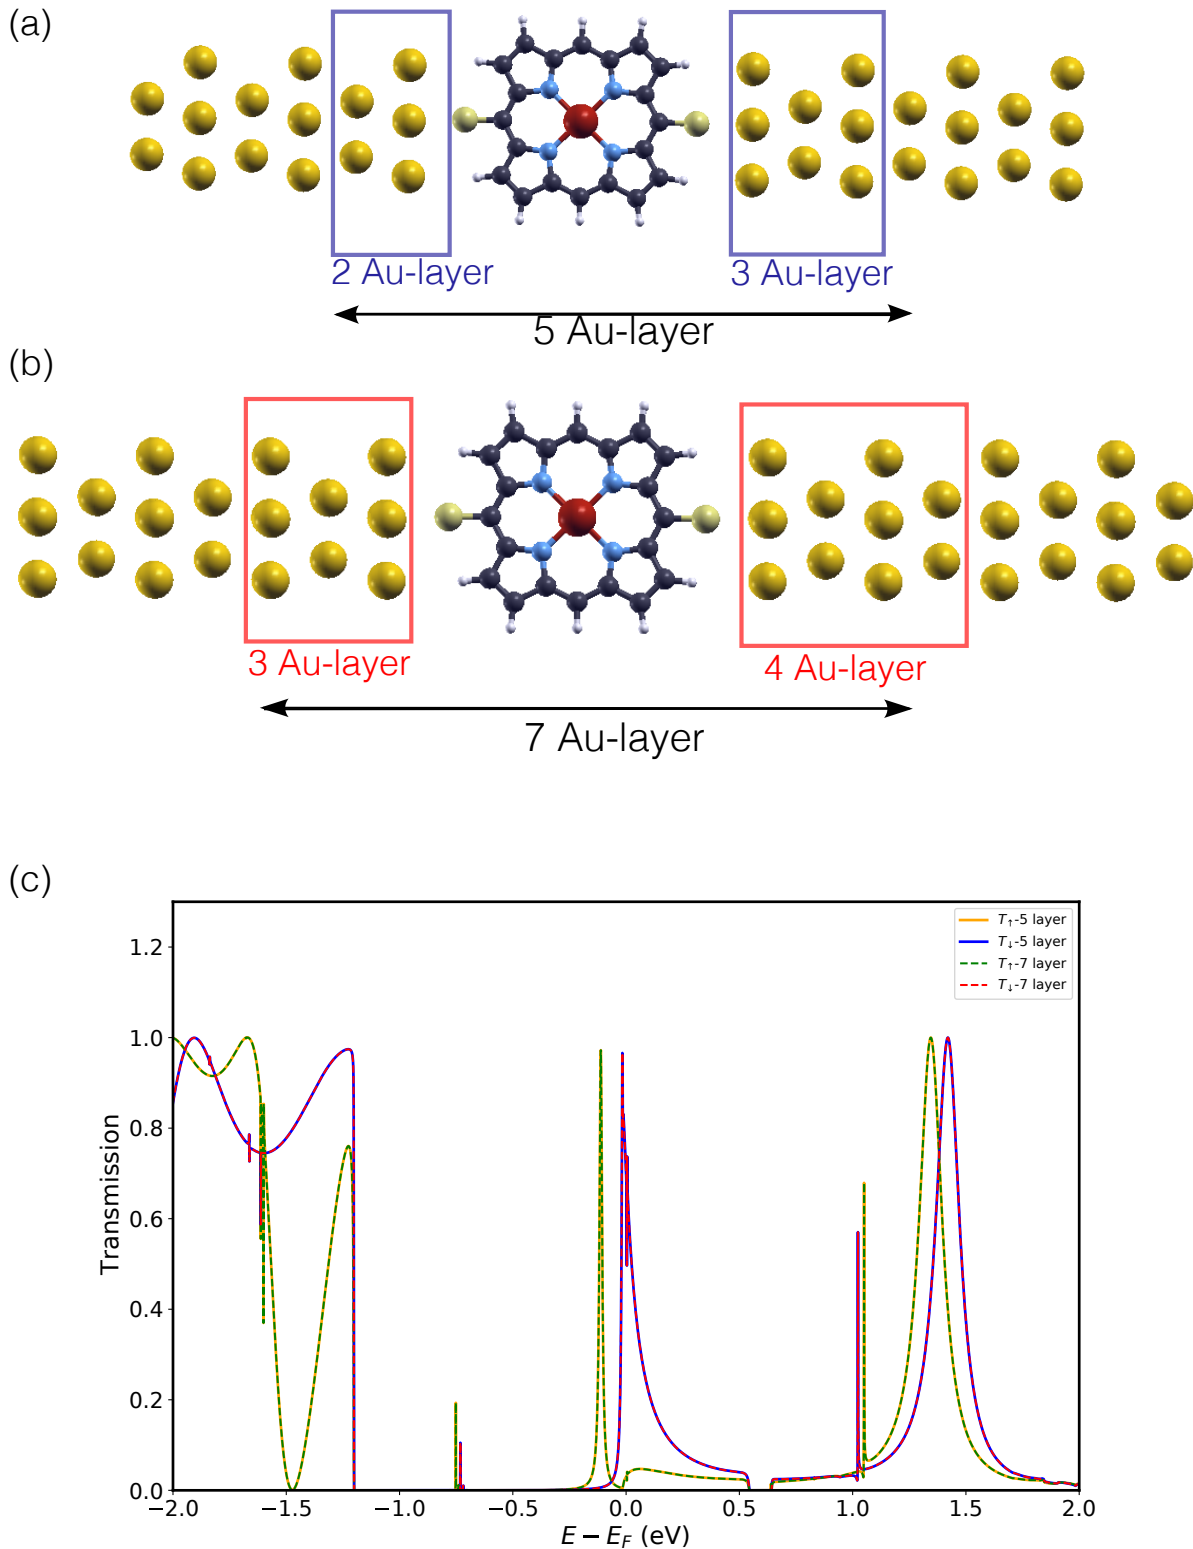

Figure S2: The structure of Au–S–FeP–S–Au device with (a) 5 Au layer and (b) 7 Au layer in extended scattering region to screen the suitable number of Au layer should be included in extended central region to avoid lateral molecule interaction and direct electrode-electrode transmission. (c) The spin-polarized transmission spectra of devices are shown in panel (a) and (b). The transmission spectra for major and minor-spins do not change by extending the central region from 5 to 7 (sum of left and right layers) Au layer.

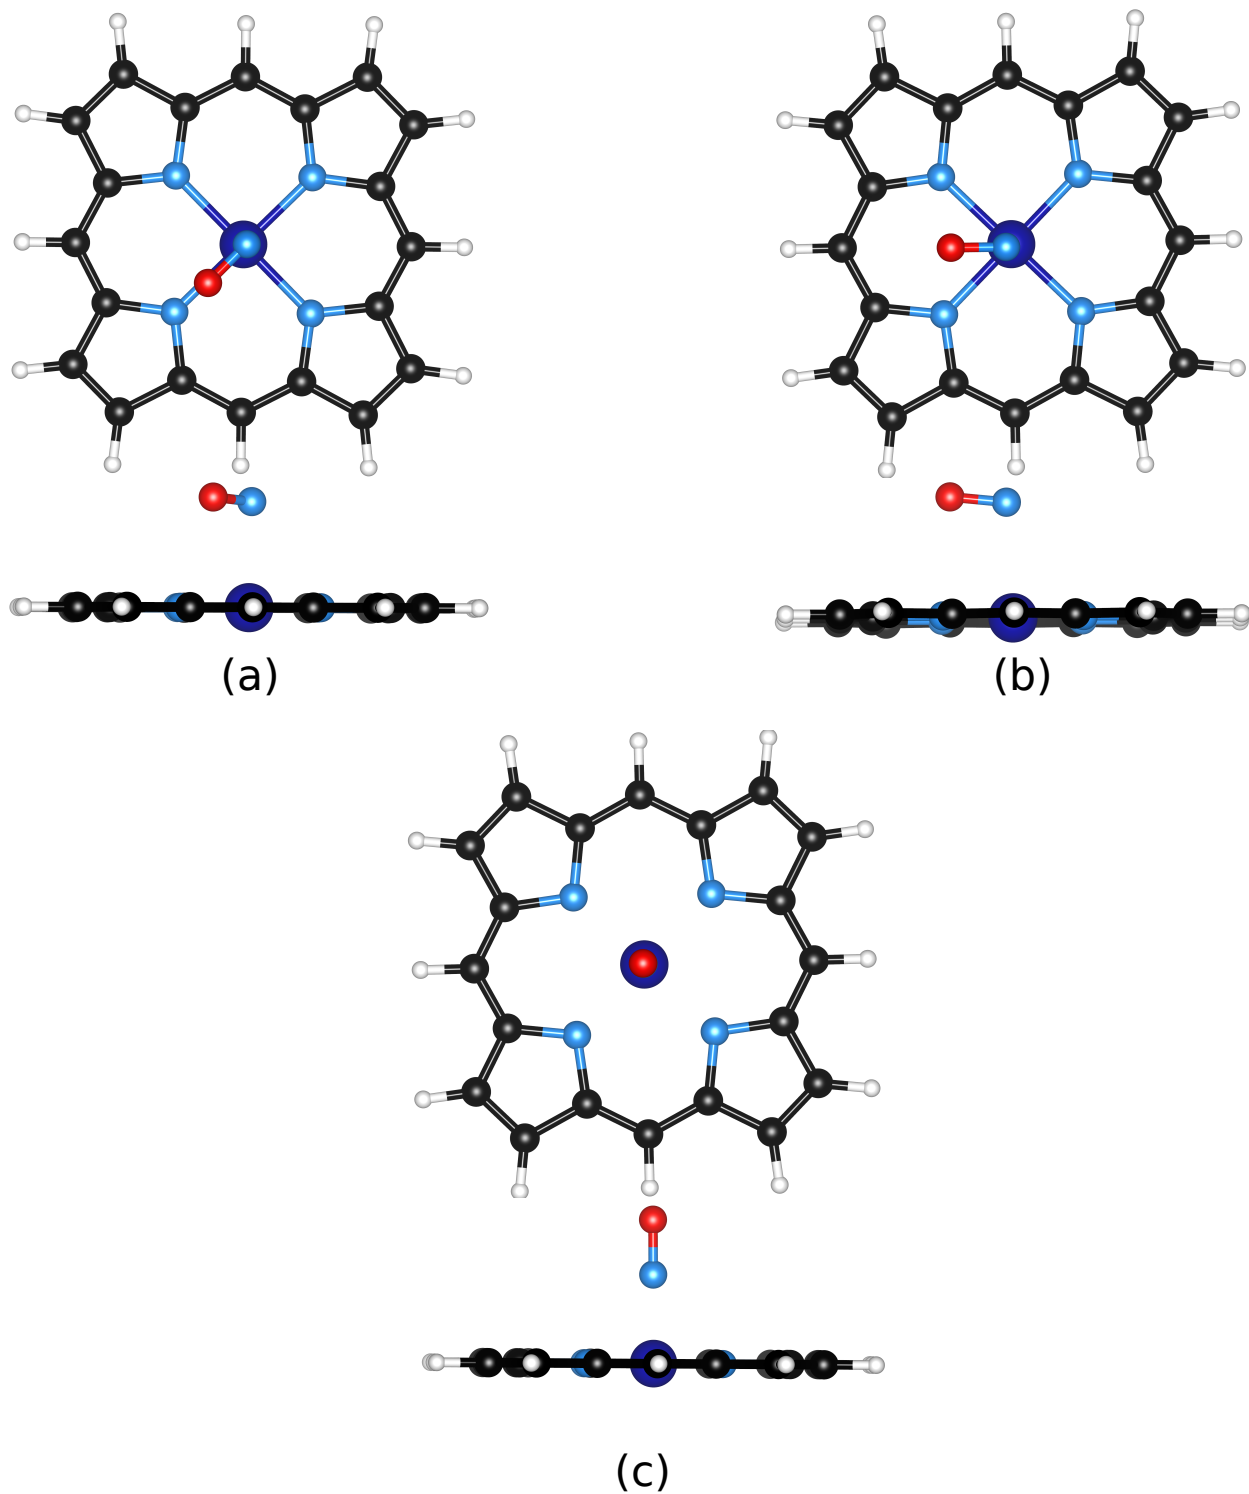

Figure S3: Different NO adsorption configurations: (a) The NO gas is placed along the two pyrrole rings: A-configuration. (b) The NO gas is positioned between the two pyrrole rings: B-configuration. (c) The NO gas is placed on the top of the central ion-magnet: C-configuration. In all three configurations the NO gas is bonded through the nitrogen atom.

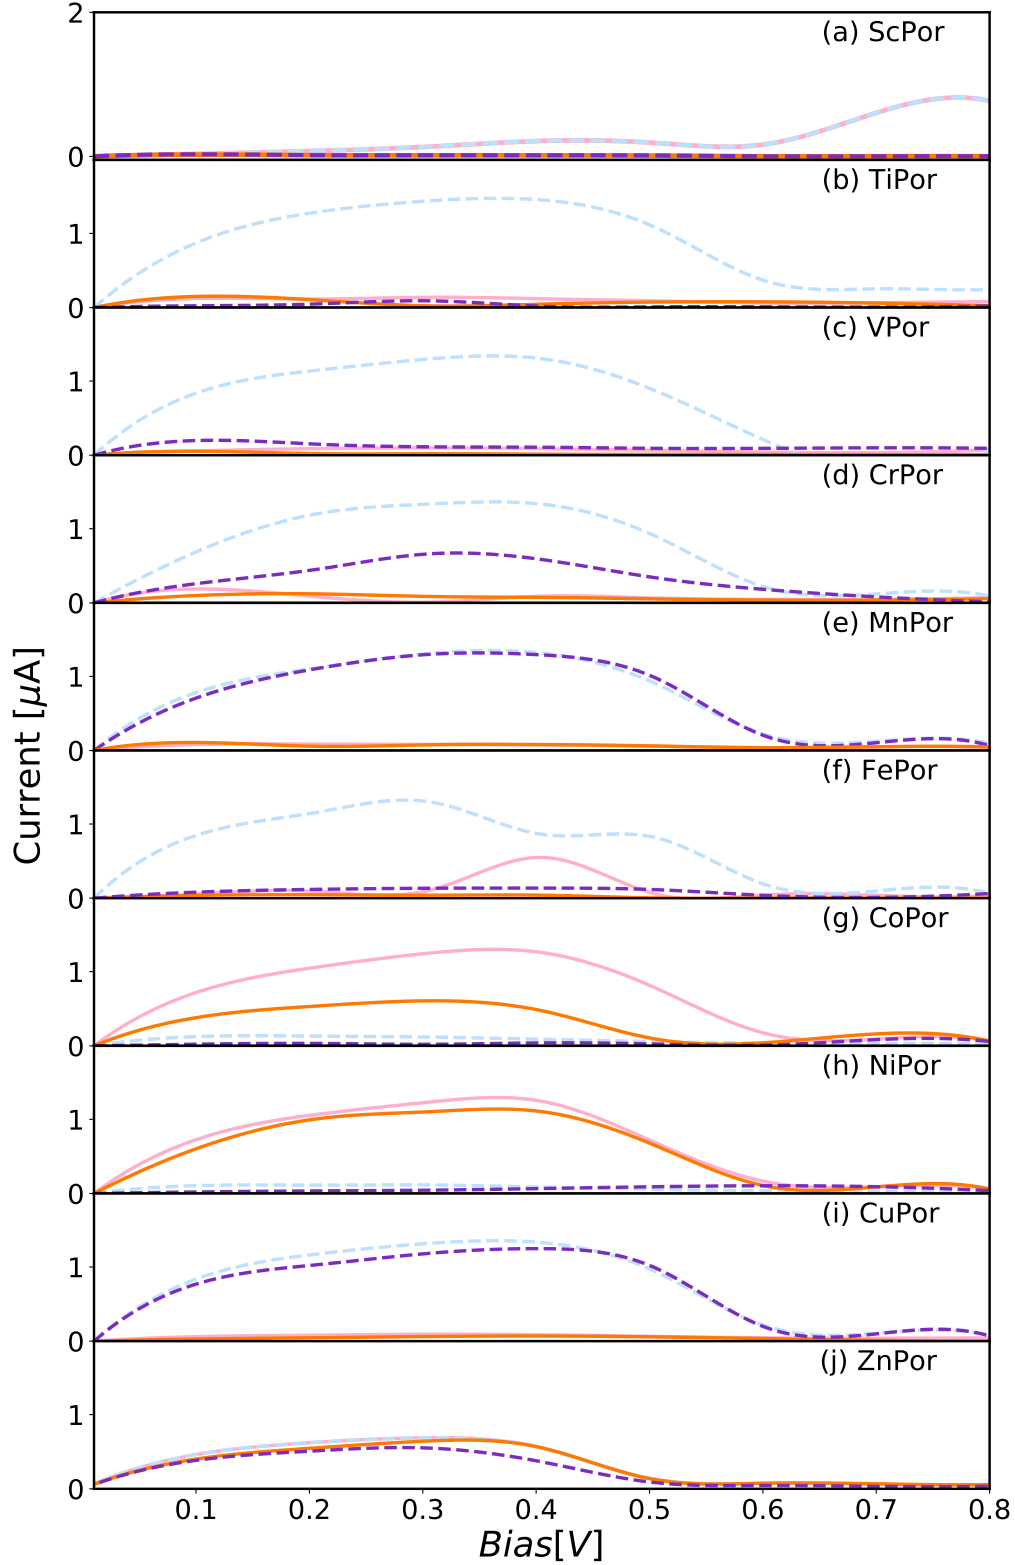

Figure S4: Calculated spin-resolved  $I - V$  curves of the pristine Au-MPor-Au and Au-NO@MPor-Au devices. The light pink and light blue colors represent the obtained  $I_{\uparrow}$  and  $I_{\downarrow}$  for Au-MPor-Au devices. The  $I_{\uparrow}$  and  $I_{\downarrow}$  of NO adsorbed devices are shown by orange and purple. The dashed curves represent the  $I_{\downarrow}$  of devices before and after NO adsorption. For simplicity, each plot is labeled by the device centered molecule



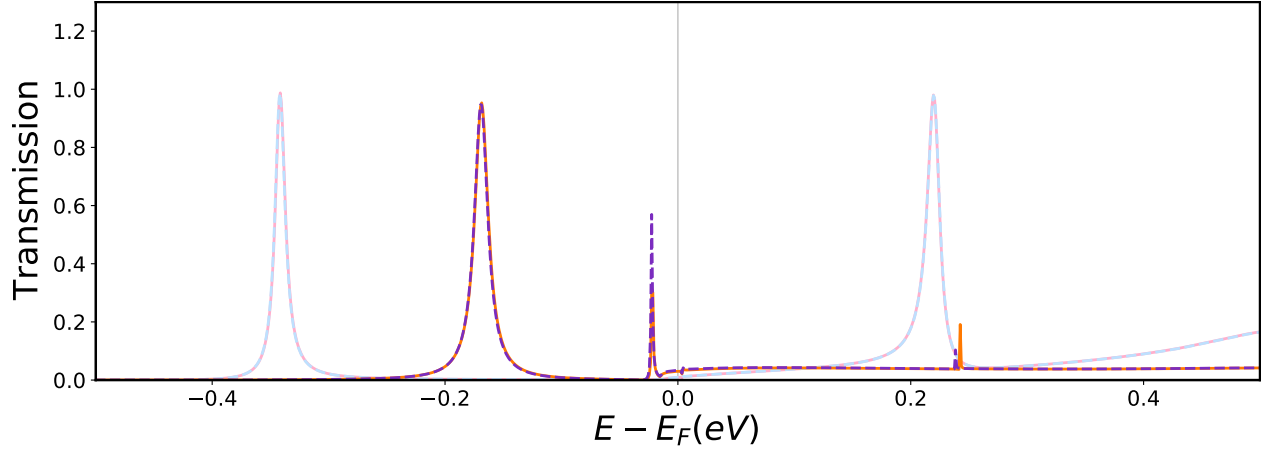

Figure S5: Spin-resolved transmission functions of Au-ScPor-Au and Au-NO@ScPor-Au at 0.0 bias voltages. The light pink and light blue colors represent the obtained  $T_{\uparrow}$  and  $T_{\downarrow}$  for Au-MPor-Au devices. The  $T_{\uparrow}$  and  $T_{\downarrow}$  of NO adsorbed devices are shown by orange and purple. The dashed curves represent the  $T_{\downarrow}$  of devices before and after NO adsorption.

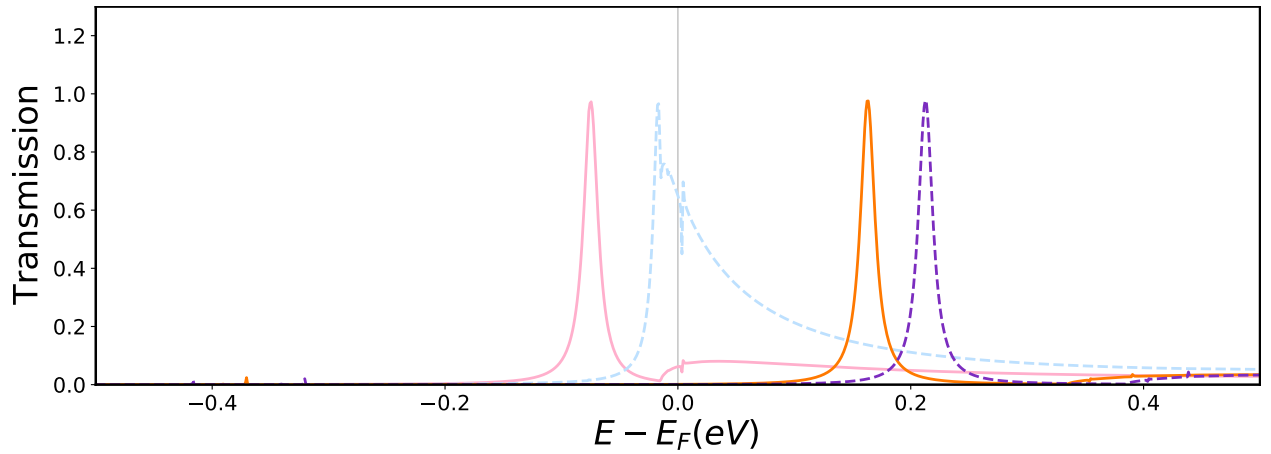

Figure S6: Spin-resolved transmission functions of Au-TiPor-Au and Au-NO@TPor-Au at 0.0 bias voltages. The light pink and light blue colors represent the obtained  $T_{\uparrow}$  and  $T_{\downarrow}$  for Au-MPor-Au devices. The  $T_{\uparrow}$  and  $T_{\downarrow}$  of NO adsorbed devices are shown by orange and purple. The dashed curves represent the  $T_{\downarrow}$  of devices before and after NO adsorption.

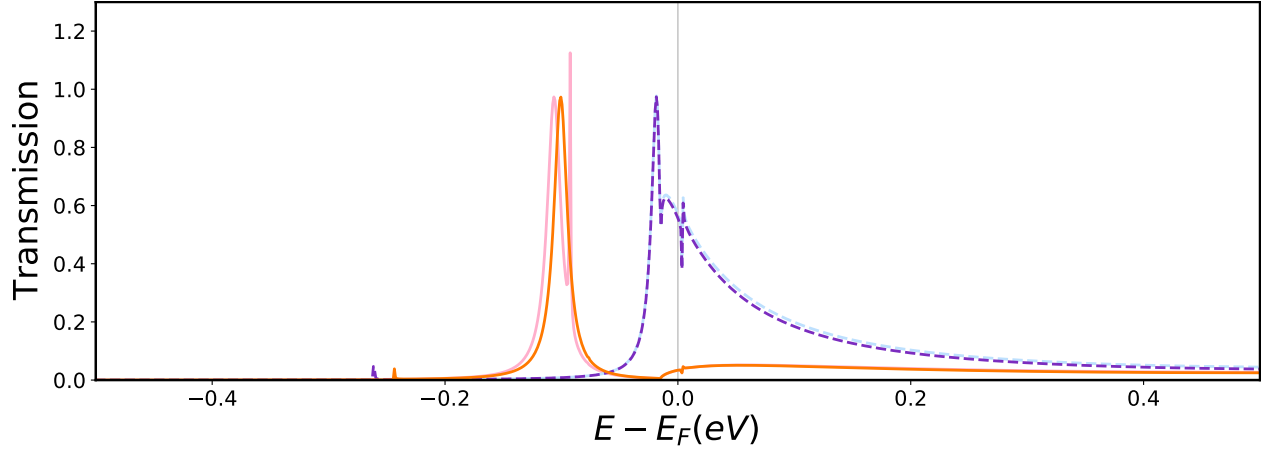

Figure S7: Spin-resolved transmission functions of Au-MnPor-Au and Au-NO@MnPor-Au at 0.0 bias voltages. The light pink and light blue colors represent the obtained  $T_{\uparrow}$  and  $T_{\downarrow}$  for Au-MPor-Au devices. The  $T_{\uparrow}$  and  $T_{\downarrow}$  of NO adsorbed devices are shown by orange and purple. The dashed curves represent the  $T_{\downarrow}$  of devices before and after NO adsorption.

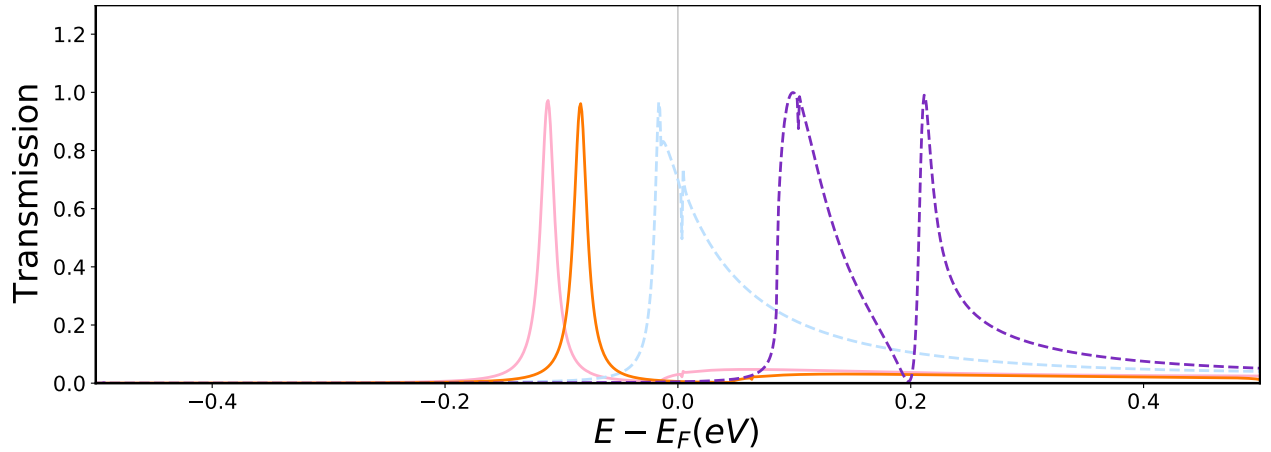

Figure S8: Spin-resolved transmission functions of Au-FePor-Au and Au-NO@FePor-Au at 0.0 bias voltages. The light pink and light blue colors represent the obtained  $T_{\uparrow}$  and  $T_{\downarrow}$  for Au-MPor-Au devices. The  $T_{\uparrow}$  and  $T_{\downarrow}$  of NO adsorbed devices are shown by orange and purple. The dashed curves represent the  $T_{\downarrow}$  of devices before and after NO adsorption.

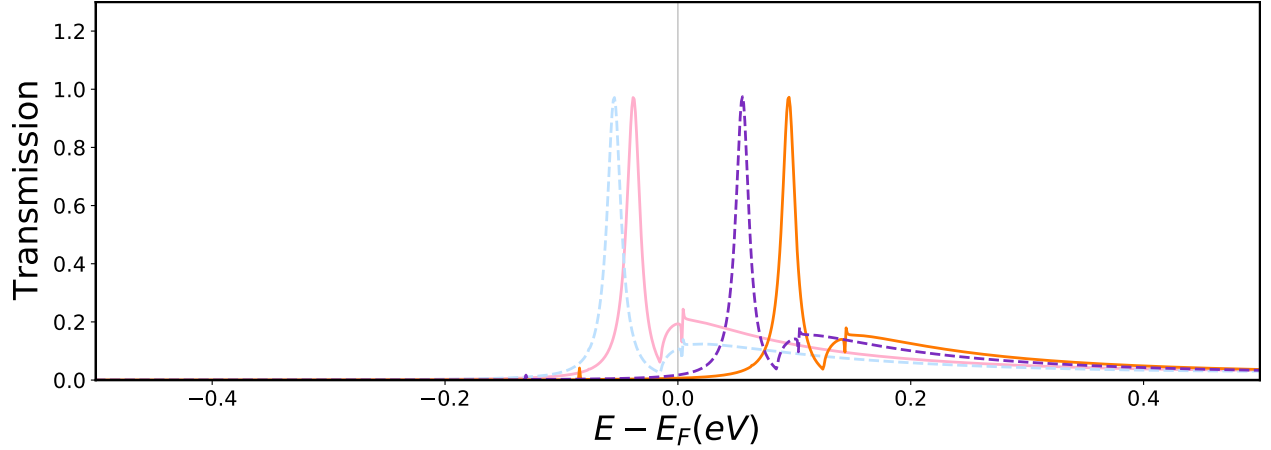

Figure S9: Spin-resolved transmission functions of Au–CoPor–Au and Au–NO@CoPor–Au at 0.0 bias voltages. The light pink and light blue colors represent the obtained  $T_{\uparrow}$  and  $T_{\downarrow}$  for Au–MPor–Au devices. The  $T_{\uparrow}$  and  $T_{\downarrow}$  of NO adsorbed devices are shown by orange and purple. The dashed curves represent the  $T_{\downarrow}$  of devices before and after NO adsorption.

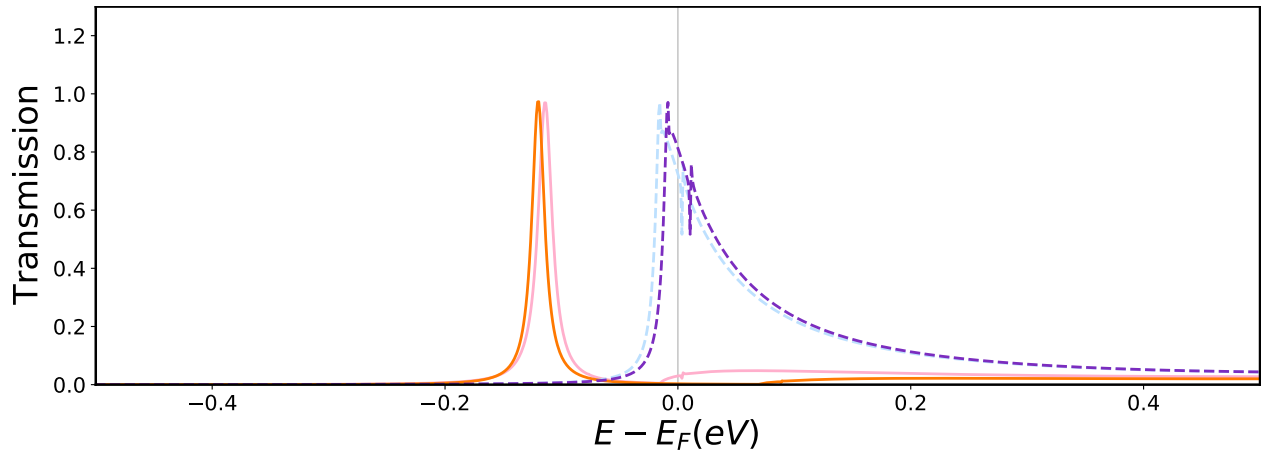

Figure S10: Spin-resolved transmission functions of Au–CuPor–Au and Au–NO@CuPor–Au at 0.0 bias voltages. The light pink and light blue colors represent the obtained  $T_{\uparrow}$  and  $T_{\downarrow}$  for Au–MPor–Au devices. The  $T_{\uparrow}$  and  $T_{\downarrow}$  of NO adsorbed devices are shown by orange and purple. The dashed curves represent the  $T_{\downarrow}$  of devices before and after NO adsorption.

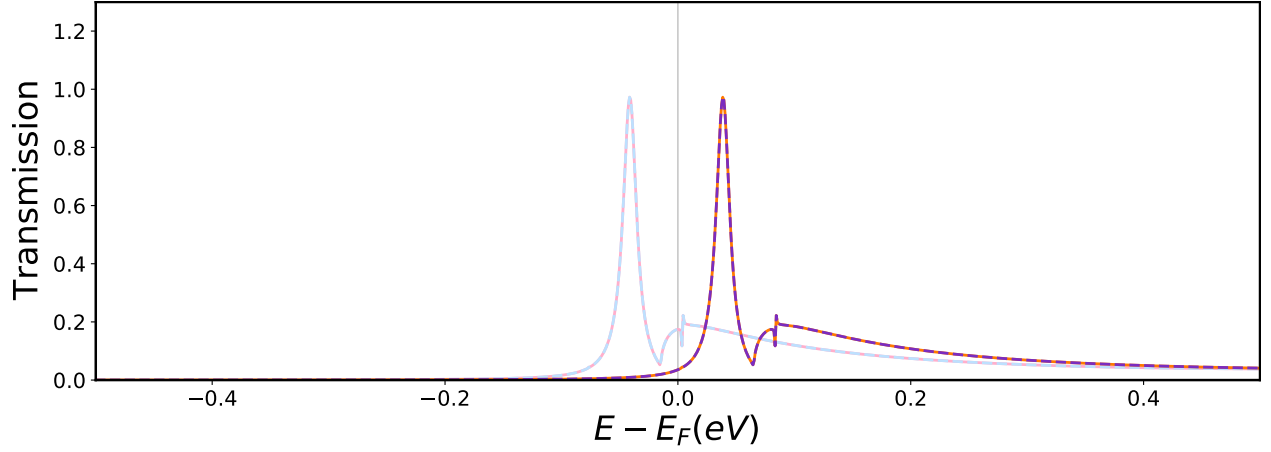

Figure S11: Spin-resolved transmission functions of Au-ZnPor-Au and Au-NO@ZnPor-Au at 0.0 bias voltages. The light pink and light blue colors represent the obtained  $T_{\uparrow}$  and  $T_{\downarrow}$  for Au-MPor-Au devices. The  $T_{\uparrow}$  and  $T_{\downarrow}$  of NO adsorbed devices are shown by orange and purple. The dashed curves represent the  $T_{\downarrow}$  of devices before and after NO adsorption.

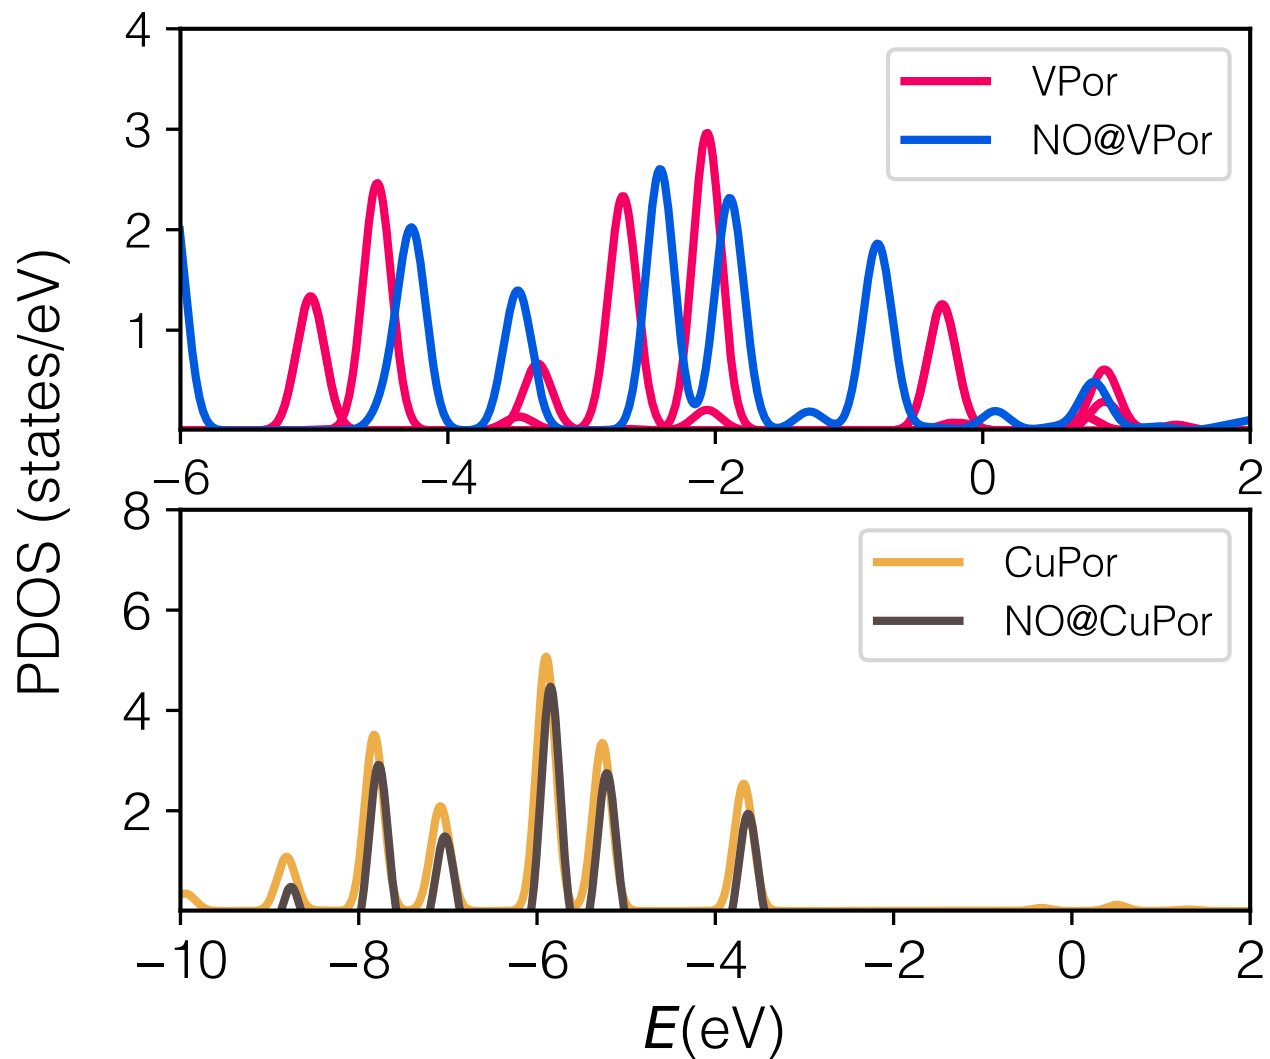

Figure S12: Projected density of states (PDOS) of  $M$  3d orbital of VPor (top) and CuPor (bottom) before and after NO adsorption.
